# Supplementary material for: Rapid dissolution of high concentration poly(3-hydroxybutyrate) using neoteric biosolvents: experiment and molecular dynamics simulation
Source: Royal Society of Chemistry journal article supplement (doi:10.1039/d3gc00793f), 2023-01-01
Supplement: d3gc00793f1.pdf [file d3gc00793f1.pdf]

## Electronic Supplementary Information (ESI)

# Rapid Dissolution of High Concentration Poly(3-hydroxybutyrate) using Neoteric Biosolvent: Experiment and Molecular Dynamics Simulation

*Joseph Kinyanjui Muiruri<sup>a,‡</sup>, Jayven Chee Chuan Yeo<sup>b,‡</sup>, Tang Yuanting Karen<sup>b</sup>, Ke Li<sup>b</sup>, Enyi*

*Ye<sup>\*a,b</sup>, Xian Jun Loh<sup>\*a,b</sup>, Zibiao Li<sup>\*a,b,c</sup>*

<sup>a</sup>Institute of Sustainability for Chemicals, Energy and Environment, 1 Pesek Road, Jurong Island, Singapore 627833

<sup>b</sup> Institute of Materials Research and Engineering, Agency for Science, Technology and Research (A\*STAR), 2 Fusionopolis Way, Innovis, Singapore 138634

<sup>c</sup> Department of Materials Science and Engineering, National University of Singapore, 9 Engineering Drive 1, Singapore 117576

<sup>‡</sup>The author contributed equally to this work.

Correspondence to: [yeey@imre.a-star.edu.sg](mailto:yeey@imre.a-star.edu.sg) (E. Ye); [lohxj@imre.a-star.edu.sg](mailto:lohxj@imre.a-star.edu.sg) (X. J. Loh);  
[lizb@imre.a-star.edu.sg](mailto:lizb@imre.a-star.edu.sg) (Z. Li)

### **This file contains:**

Number of pages: 4

Number of Figures: 2

Number of Tables: 3

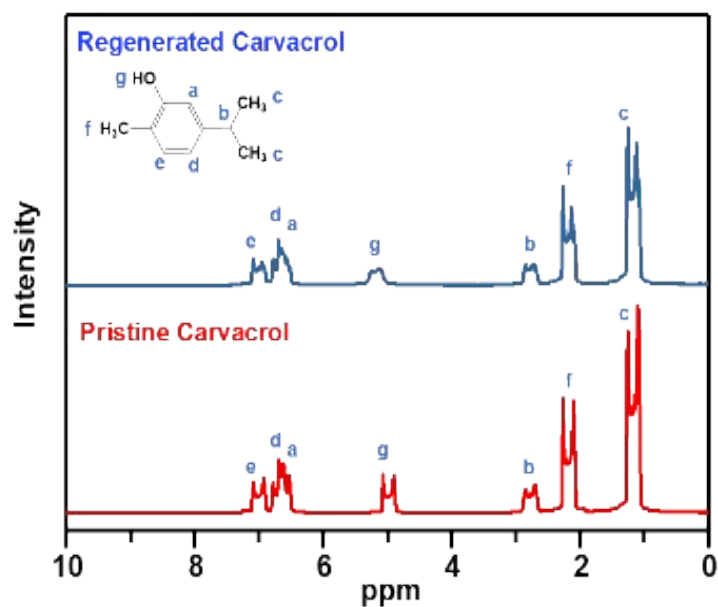

**Figure S1.** <sup>1</sup>H NMR spectra for pristine carvacrol (bottom) and recovered/regenerated carvacrol (top).

**Table S1.** Activation energies of selected Carv-PHBx samples

| Samples    | Activation energy |       |
|------------|-------------------|-------|
|            | (kJ/mol)          | R     |
| Carv-PHB3  | 35.63±0.30        | 0.993 |
| Carv-PHB5  | 35.82±0.23        | 0.996 |
| Carv-PHB10 | 36.58±0.18        | 0.998 |
| Carv-PHB20 | 27.26±0.16        | 0.997 |

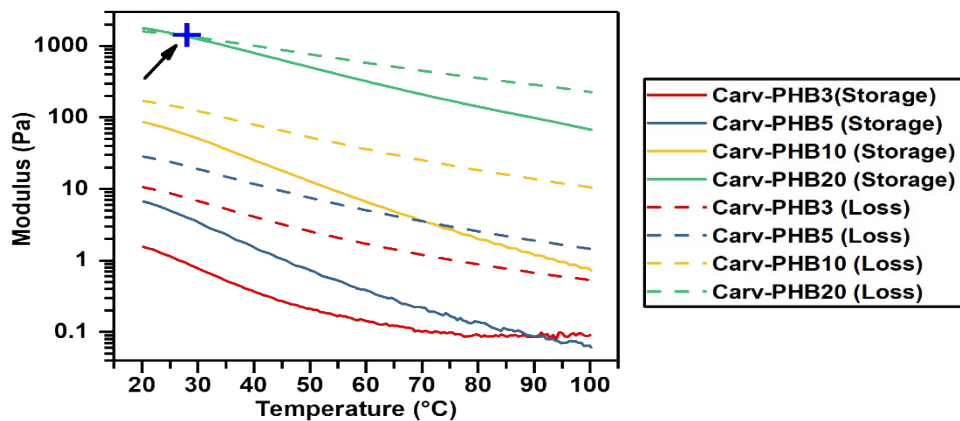

**Figure S2.** Storage modulus ( $G'$ ) and Loss modulus ( $G''$ ) of carvacrol/PHB samples as a function of temperature.

**Table S2.** Composition of bioadhesive formulation (Carv-PHB\_Adh)

| Ingredient      | (~% w/w)   |
|-----------------|------------|
| PHB             | 22.3       |
| Gum rosin       | 17.8       |
| Natural Beeswax | 4.5        |
| Carvacrol       | 55.4       |
| <b>Total</b>    | <b>100</b> |

**Table S3.** H-bond densities obtained using Molecular Dynamic (MD) simulation for Carv-PHBx samples

| Samples    | Total H-bonds density |        | Carv-Carv H bonds |        | PHB-Carv H bonds |        | PHB-PHB H bonds |        | Diffusion coefficient ( $1 \times 10^5 \text{ cm}^2/\text{s}$ ) |        | H bond breaking (20-100 °C) |
|------------|-----------------------|--------|-------------------|--------|------------------|--------|-----------------|--------|-----------------------------------------------------------------|--------|-----------------------------|
|            | 20 °C                 | 100 °C | 20 °C             | 100 °C | 20 °C            | 100 °C | 20 °C           | 100 °C | 20 °C                                                           | 100 °C |                             |
| Carv-PHB1  | 493                   | 291    | 479               | 280    | 14               | 11     | 0               | 0      | 0.033                                                           | 0.92   | 202                         |
| Carv-PHB3  | 517                   | 309    | 475               | 276    | 42               | 31     | 1               | 2      | 0.03                                                            | 0.76   | 208                         |
| Carv-PHB5  | 532                   | 325    | 463               | 271    | 67               | 51     | 2               | 3      | 0.026                                                           | 0.69   | 207                         |
| Carv-PHB10 | 581                   | 372    | 427               | 254    | 150              | 111    | 4               | 7      | 0.014                                                           | 0.54   | 209                         |
| Carv-PHB20 | 651                   | 472    | 383               | 220    | 245              | 236    | 22              | 17     | 0.0081                                                          | 0.37   | 179                         |
